Analysis of SARS-CoV-2 mutations associated with resistance to therapeutic monoclonal antibodies that emerge after treatment.

Daniele Focosi<sup>1,#</sup>

Scott McConnell<sup>2</sup>

David J. Sullivan<sup>2</sup>

Arturo Casadevall<sup>2</sup>

<sup>1</sup>North-Western Tuscany Blood Bank, Pisa University Hospital, Italy.

<sup>2</sup>Department of Molecular Microbiology and Immunology, Johns Hopkins Bloomberg School of Public Health, Baltimore, MD 21205, USA.

#corresponding author: [daniele.focosi@gmail.com](mailto:daniele.focosi@gmail.com).

**Word counts:** abstract: 235; body 1941.

**Keywords:** COVID-19; SARS-CoV-2; monoclonal antibodies; sotrovimab; casirivimab; imdevimab; tixagevimab; cilgavimab.

**Author contributions:** D.F. performed literature search and wrote the first draft. A.C. revised the manuscript. D.J.S. revised the manuscript and curated Table 3. S.M. designed Figure 2.

**Conflict of interest statement:** We declare we have no COI related to this manuscript.

**Funding:** none.

## Abstract

The mutation rate of the Omicron sublineage has led to baseline resistance against all previously authorized anti-Spike monoclonal antibodies (mAbs). Nevertheless, in case more antiviral mAbs will be authorized in the future, it is relevant to understand how frequently treatment-emergent resistance has emerged so far, under different combinations and in different patient subgroups. We report the results of a systematic review of the medical literature for case reports and case series for treatment-emergent immune escape, which is defined as emergence of a resistance-driving mutation in at least 20% of sequences in a given host at a given timepoint. We identified 31 publications detailing 201 cases that included different variants of concern (VOC) and found that the incidence of treatment emergent-resistance ranged from 10% to 50%. Most of the treatment-emergent resistance events occurred in immunocompromised patients. Interestingly, resistance also emerged against cocktails of two mAbs, albeit at lower frequencies. The heterogenous therapeutic management of those cases doesn't allow

35 inferences about the clinical outcome in patients with treatment-emergent resistance. Furthermore, we  
36 noted a temporal correlation between the introduction of mAb therapies and a subsequent increase in  
37 SARS-CoV-2 sequences across the globe carrying mutations conferring resistance to that mAb, raising  
38 concern as to whether these had originated in mAb-treated individuals. Our findings confirm that  
39 treatment-emergent immune escape to anti-Spike mAbs represents a frequent and concerning  
40 phenomenon and suggests that these are associated with mAb use in immunosuppressed hosts.

## Introduction

Passive antibody pre-exposure and post-exposure prophylaxis and treatments are much needed for immunocompromised patients at risk of COVID-19 progression. For them, anti-Spike monoclonal antibodies (mAb) have been the treatment of choice since early 2021. The biologicals were safe, well tolerated and efficient at preventing disease and reducing the likelihood of progression to severe disease. Unfortunately, the advent of the Omicron VOC progressively defeated the emergency use authorized mAbs, leaving all revoked by the US Food and Drug Administration at the time of writing. The COVID-19 pandemic has represented the first instance of large-scale deployments of passive immunotherapies against an infectious agent, and with persistence at epidemic levels and fluctuations in the dominant variants, it is possible that this scenario will persist for more years. This in turn provides a unique opportunity to study the phenomenon of emerging resistance to antibody-based therapeutics. The emergence of mAb-resistant variants after individualized therapy has potential public health implications if these viruses re-enter the general population and are able to evade vaccine or prior infection immunity by virtue of their mutations (Casadevall and Focosi, 2023). Here we analyzed mAbs resistance patterns following therapy principally in immunosuppressed but sometimes in immunocompetent COVID-19 patients.

## Materials and methods

### *Inferring baseline resistance to anti-Spike monoclonal antibodies.*

The Stanford University Coronavirus Antiviral & Resistance Database is a comprehensively curated collection of published data on the susceptibility of SARS-CoV-2 variants to anti-Spike mAbs and the plasma from previously infected and/or vaccinated persons. It also records the Spike protein mutations that are selected by mAbs and that emerge in persons experiencing prolonged infection (Tzou et al., 2020). It is publicly accessible at <https://covdb.stanford.edu/>. For each authorized anti-Spike mAb, we manually scanned mutations associated with >5-fold median reduction in neutralizing antibody (nAb) titers from primary research listed in search results provided at [https://covdb.stanford.edu/search-drdb/?form\\_only](https://covdb.stanford.edu/search-drdb/?form_only). The cutoff was arbitrarily chosen by the authors based on former literature suggesting loss of therapeutic efficacy.

### *Literature search*

On February 1 2023, we searched PubMed, bioRxiv and medRxiv repositories for literature published since January 1 2020 to February 1 2023 using English language as a restriction. We used the query “(“sotrovimab” OR “tixagevimab” OR “cilgavimab” OR “bamlanivimab” OR “etesevimab” OR “casirivimab” OR “imdevimab” OR “bebtelovimab” OR “regdanvimab”) AND (“resistance” OR “escape” OR “evasion” OR “evolution”)”. The PRISMA flowchart is reported in Figure 1. We excluded all primary research on baseline (as opposed to treatment-emergent) resistance and all secondary research. We collected data about sample size, underlying immunosuppression and incidence of *de novo* mutations at Spike residues associated with mAb escape.

### *Determining the temporal relationship between mAb authorization and global prevalence*

On February 1 2023 we searched CoV-Spectrum.org (Chen et al., 2021a) for worldwide prevalence of SARS-CoV-2 sublineages carrying either at least one mutation conferring resistance to a given mAb or just the major resistance associated mutations (i.e., Q493X for bamlanivimab and etesevimab, R346X for cilgavimab, K444X for bebtelovimab).

### *Mapping treatment emergent mutations to the structures of Spike:mAb complexes*

All three-dimensional molecular representations were generated with PyMOL 2.5.2 (Schrodinger). Deposited structures of therapeutic mAbs in complex with the Spike protein were obtained from the Protein Database (PDB) under the accession numbers 7KMG (bamlanivimab), 7C01 (etesevimab), 6XDG (casirivimab/imdevimab), 7L7E (cilgavimab), 7L7D (tixagevimab) and 6WPS (sotrovimab).

## **Results**

The individual Spike amino acid mutations conferring resistance to each mAb are summarized in Table 1. A review of 31 publications reporting mAb resistance yielded a list of Spike protein mutations associated with mAb resistance (Table 2). From these publications we identified 201 out of 1060 patients who experienced emergence of resistant SARS-CoV-2 after treatment with one of the anti-Spike mAb. As expected from real-world indications and usage, the majority of these patients were immunocompromised, but immunocompetent patients were also noted (Sabin et al., 2022).

26 publications reported incidence rates while investigating a cohort: among them the incidences varied between 0% to 100% with overall 195/1079 or 18.1%. In particular bamlanivimab (n=5) ranged from 11 to 83%, sotrovimab (n=10) from 16 to 100%, while dual mAbs (n=10) ranged from 0% to 50%.

The majority of resistant cases from cohorts were reported after mAb monotherapies bamlanivimab (23/160-14%) or sotrovimab (131/427-31%) as opposed to mAb cocktails bamlanivimab+ etesevimab (15/270-6%) or casirivimab+ imdevimab (16/185-9%) (Table 3). The cilgavimab+ tixagevimab essentially had a single active mAb during most of its deployment and the rate in the series cohorts was similar to single monoclonals (10/37-27%).

Studies with a specific mAb or mAb cocktail largely reported the same set of emerging Spike mutations (e.g., Q493X and E484X for bamlanivimab, P337X and E340X for sotrovimab).

By querying the Spike protein sequence database for the major mutations associated with mAb-resistance we noted that these mutations emerged in the general population across the globe shortly after marketing authorization of the mAbs to whom they confer resistance (Figure 3). The most striking examples are the emergence of S:Q493R (the single mutation conferring resistance to both bamlanivimab and etesevimab, in addition to casirivimab and regdanvimab) in Omicron BA.1 shortly after the massive deployment of bamlanivimab/etesevimab cocktail, and the emergence of S:R346X in many converging Omicron sublineages shortly after the massive deployment of cilgavimab for post-exposure prophylaxis in immunosuppressed patients. There was a single case report of bebtelovimab resistance (S:V445A post treatment in an immunocompromised patient with the B.1.23 lineage).

# Discussion

The emergence of mAb treatment resistance during therapy is a common and consistent phenomenon. The discrepancy between the diversity of mutations reported *in vitro* (Table 1) and the few ones detected *in vivo* (Table 2) can be explained by various factors. First, not all mutants selected *in vitro* are fit enough to compete within the intrahost quasispecies swarm. Fitness would include the ability to bind to its cellular receptor as well capacity for virion stability and assembly. The large number of mutations shown to confer resistance *in vitro* that are not reflected in the clinical data could be rationalized by the fact that a reduction in nAb titers measured *in vitro* reflects a defect in antibody binding to Spike variants but does not report on the relative efficacy of ACE2 binding compared to the ancestral Spike. Second, in many cases some mutations were already occurring at baseline (e.g., F486X in patients treated with tixagevimab). Third, among the residues wild-type at baseline, the mutations associated with the highest fold-reduction in neutralization have been more commonly reported: while this could be a notoriety bias by the investigators (placing more attention to the mutations which have been previously reported), it is likely that as soon as one of the highly resistant mutations emerges, emergence of additional mutations do not provide any further fitness advantage.

No cases of treatment-emergent resistance have been reported in the medical literature after regdanvimab: this is likely due to usage much limited in time and locations across the globe. Regdanvimab is not effective against Omicron lineages, limiting its use to a few weeks in the end 2021.

Most anti-Spike mAbs authorized thus far were not formally investigated in randomized controlled trials (RCT) involving immunocompromised patients prior to deployment (Focosi et al., 2022a). Immunocompromised patients are at increased risk for anti-Spike mAb treatment-emergent resistance for multiple risk factors: higher basal viral load, higher likelihood of viral persistence because of inadequate immune response, and contraindications to other directly-acting antivirals (Casadevall and Focosi, 2023). Resistance monitoring is not routinely performed after outpatient mAb treatment, and viral sequencing interpretation requires paying attention to minoritarian sequences within the quasispecies swarm (Vellas et al., 2022a).

Despite FDA deauthorization, many US physicians continued prescription of deauthorized anti-Spike mAbs (Anderson et al., 2022), mostly based on personal beliefs in discrepancies between *in vitro* and *in vivo* activities. The latter phenomenon has been much amplified across Europe (Focosi and Tuccori, 2022), where EMA has never withdrew a single authorized mAb to date, and only sporadically issued alerts about possible basal resistance. In addition, a plethora of uncontrolled or poorly controlled literature is advocating continued efficacy of anti-Spike mAbs based on marginal gains in surrogate endpoints in non-RCTs (Harman et al., 2022) or no change in hospitalization rates of outpatients (Patel et al., 2023). While binding affinity seems a robust surrogate endpoint, advocates of residual *in vivo* activity argue that the concentrations achieved by mAbs *in vivo* can overcome several degrees of baseline resistance to neutralization or that alternative effector function still persists (Stadler et al., 2022a; Stadler et al., 2022b; Wu et al., 2022). Both arguments do not seem robust: with IC<sub>50</sub> above 1,000 (Cao et al., 2022) antigen binding by the mAb is compromised, and effector functions other than neutralization invariably require binding to the virus to activate Fc-receptors. Under the current variant soup (Focosi et al., 2023), the incompatible turnaround time of viral sequencing and therapeutics delivery, tools to predict basal efficacy of anti-Spike mAbs based on regional genomic surveillance have been developed (Focosi, 2023).

Of interest, several cases of mAb-treatment-emergent immune escape were rescued with COVID-19 convalescent plasma (Halfmann et al., 2022; Pommeret et al., 2021), which, in contrast to mAbs, is polyclonal and thus more difficult to defeat by viral evolution.

We note that in many patients the emergence of mAb resistance was associated with only one amino acid substitution in the epitope, establishing the high vulnerability of monotherapy for selecting resistant variants. Emergence of resistance requires selection of mutant viruses that are fit for replication and that could explain the repeated independent isolations of variants with mutations at specific residues, such as in position 484 with bamlanivimab monotherapy. For some mAbs, the generated footprint is so unique (e.g. S:340X after sotrovimab) that baseline sequencing is not needed to confirm treatment emergence (S:340X being exceedingly rare in GISAID). The transmissibility of such mAb treatment-generated lineages remains a major concern, and it has been formally demonstrated in at least one study (Sabin et al., 2022). Clinical reports of treatment-emergent resistance in response to therapeutic mAbs reviewed here encompass nearly every epitope of the receptor binding domain (RBD), including all 3 receptor binding motif epitopes and the cross reactive S309 site (Figure 2F). Despite partial or complete overlap of antibody epitope on RBD with the ACE2 interface, these positions demonstrate remarkable mutability while maintaining receptor affinity.

Since therapeutic mAbs ultimately trace their ancestry to immune B cells in humans, the emergence of mAb resistance mutations poses the theoretical concern that once these occur in immunosuppressed individuals the mAb-resistant variants can spread to immunocompetent populations, bypass existing immunity, and create new waves of infection (Casadevall and Focosi, 2023). Consistent with this concern we found a temporal association between the introduction of the mAb and an increase in frequency in the SARS-CoV-2 Spike protein sequence database. Such temporal association could be explained by a scenario whereby the emergence of these variants in immunosuppressed hosts was followed by their spread among the general population. Such mutations would have created antigenically distinct viruses that could have an advantage in bypassing established immunity in the general population from vaccination and prior infection as these occur in a critical neutralizing epitope. We caution that association does not imply causation and that other interpretations are possible. For example, immunity to previous infection waves could be another possible driver for selection of novel Spike variants, and the possibility of viral transitioning through animal reservoirs remains as possibility since Q493R is a mouse-adapting mutation, which in turn suggests the possibility of reverse zoonosis. Nevertheless, the temporal association between mAb introduction in clinical practice and increased frequency of mutations conferring resistance to that mAb is concerning and suggest that future use of mAb therapies in immunocompromised populations should consider the use of cocktails and/or combination therapy with small molecule antivirals. Cocktails-of-three or more anti-Spike mAbs with non-overlapping epitopes could minimize the chances for immune escape.

**Figure 1.** PRISMA flowchart for study selection.

**Figure 2.** Resistance mutations on the Spike receptor binding domain (RBD) reported after treatment with authorized anti-Spike mAbs. A-D) The complex structures of RBD and corresponding therapeutic mAbs are represented as space-filling surfaces, where the RBD is colored black, the receptor binding motif (residues 438-507) is colored dark gray, and corresponding escape mutations are highlighted in yellow. In the middle panel, the entire RBD-mAb complex is depicted, and expanded and rotated views of each interface are presented in boxes on each side of the main complex. The interacting mAb is partially transparent to enable visualization of the full RBD paratope and reported resistance mutations are labeled. A) The structural complex of the bamlanivimab/etesevimab mAb cocktail with RBD is depicted. Bamlanivimab and etesevimab (PDBID 7KMG, 7C01) are colored blue and red, respectively. B) The structural complex of the casirivimab/imdevimab mAb cocktail (REGN-CoV) with RBD is depicted. Casirivimab and imdevimab (PDBID 6XDG) are colored salmon and dark green, respectively. C) The structural complex of the cilgavimab/tixagevimab mAb cocktail with RBD is depicted. Cilgavimab and tixagevimab (PDBID 7L7E, 7L7D) are colored purple and cyan, respectively. D) The structural complex of the sotrovimab mAb monotherapy with RBD is depicted. Sotrovimab (PDBID 6WPS) is colored light green. E) A summary of the reported treatment-emergent resistance mutations on RBD across all approved anti-Spike therapeutic mAbs are highlighted on the structure of RBD, shown with the front face, back face and top RBM view. Escape mutations in the RBM are highlighted in blue, non-RBM mutations are colored red. F) The complexes of the each of the mAbs in complex with RBD are depicted, colored as in panels A-D, to illustrate the relative binding angles and epitopes of each mAb.

**Figure 3.** Timeline of anti-Spike mAb authorizations and emergence of key Spike mutations associated with mAb resistance. Figure generated using Cov-Spectrum.org (Chen et al., 2021a)

**Table 1.** Spike mutations associated with mAb resistance in *in vitro* studies. Bold characters show the ones that have been detected as emerged *in vivo* after treatment with the specific mAb. In cases where the exact amino acid change has not been studied *in vitro*, only the residue is highlighted. Number within parentheses represent the median fold-reduction in neutralizing antibody titers.

| mAb          | Spike mutation                                                                                                                                                                                                                                                                                                                                                                                                                                                                                                                                                                                                                                                                                                                                                                                                                                                                                                                                                                                                                                                                                                                                                                                                                                                                                                                                                            |
|--------------|---------------------------------------------------------------------------------------------------------------------------------------------------------------------------------------------------------------------------------------------------------------------------------------------------------------------------------------------------------------------------------------------------------------------------------------------------------------------------------------------------------------------------------------------------------------------------------------------------------------------------------------------------------------------------------------------------------------------------------------------------------------------------------------------------------------------------------------------------------------------------------------------------------------------------------------------------------------------------------------------------------------------------------------------------------------------------------------------------------------------------------------------------------------------------------------------------------------------------------------------------------------------------------------------------------------------------------------------------------------------------|
| cilgavimab   | S: <b>346I</b> (> 200 (FDA, 2021)), S:444E (>200 (FDA, 2021; House et al., 2022)), S:444Q (>200 (FDA, 2021; House et al., 2022)), S: <b>444R</b> (>200 (FDA, 2021)), S:445A (36 (FDA, 2021)) , S:446S (3.7 (Ai et al., 2022; Liu et al., 2021; Tada et al., 2022a; Wang et al., 2022b; Zhou et al., 2021)), S:447R (472 (House et al., 2022)), S:450D (382 (House et al., 2022), S:450K (9 (FDA, 2021)), S: <b>452R</b> (5 (FDA, 2021; House et al., 2022; Wang et al., 2022a))                                                                                                                                                                                                                                                                                                                                                                                                                                                                                                                                                                                                                                                                                                                                                                                                                                                                                           |
| tixagevimab  | S:371F (26 (Ai et al., 2022; Iketani et al., 2022; Zhou et al., 2022), S:484A (4.9 (Ai et al., 2022; Liu et al., 2021; Tada et al., 2022a)), S:484D (7 (FDA, 2021)), S:484K (8.1 ((Annavajhala et al., 2021; Chen et al., 2021b; FDA, 2021; Wang et al., 2021b; Wang et al., 2021d), S:486S (>600 (FDA, 2021)), S:486V (135 (FDA, 2021; Wang et al., 2022a)), S:493R (6.5 (Ai et al., 2022; FDA, 2021; Liu et al., 2021)), S:990A (6.1 (FDA, 2021)), S:1009I (8.2 (FDA, 2021))                                                                                                                                                                                                                                                                                                                                                                                                                                                                                                                                                                                                                                                                                                                                                                                                                                                                                            |
| bebtelovimab | S:444N (> 1000 ), S:444Q (>140 (Westendorf et al., 2022)), S:444T (>1000 ), S:445A (>90 (Westendorf et al., 2022)), S:445F (369 ), S:445G (>730 ), S:446D (69 ), S:446R (7 ), S:446V (5.5 (Westendorf et al., 2022)), S:499H (>1000 (Westendorf et al., 2022)), S:499R (>1000 (Westendorf et al., 2022)), S:449S (45 (Westendorf et al., 2022))                                                                                                                                                                                                                                                                                                                                                                                                                                                                                                                                                                                                                                                                                                                                                                                                                                                                                                                                                                                                                           |
| sotrovimab   | S: <b>337H</b> (6 (Cathcart et al., 2021)), S: <b>337L</b> (180 (Cathcart et al., 2021)), S: <b>337R</b> (>192 (Cathcart et al., 2021)), S: <b>337T</b> (7 (Cathcart et al., 2021)), S: <b>340A</b> (>100 (Cathcart et al., 2021)), S: <b>340D</b> (12 (Cathcart et al., 2021; Gliga et al., 2022)), S: <b>340G</b> (22 (Cathcart et al., 2021)), S: <b>340K</b> (>297 (Cathcart et al., 2021; Gliga et al., 2022; Yi et al., 2021)), S: <b>340Q</b> (>50 (Cathcart et al., 2021)), S: <b>340V</b> (>200 (Cathcart et al., 2021)), S: <b>356T</b> (5.9 (Cathcart et al., 2021)), S: <b>371F</b> (13 (Ai et al., 2022; Iketani et al., 2022; Zhou et al., 2022)), S: <b>371L</b> (12 (Ai et al., 2022; Liu et al., 2021; Tada et al., 2022a; Zhou et al., 2021)), S:377K (> 704 (Cathcart et al., 2021))                                                                                                                                                                                                                                                                                                                                                                                                                                                                                                                                                                   |
| casirivimab  | S:371F (14 (Ai et al., 2022; Iketani et al., 2022; Zhou et al., 2022)), S:405N (11 (Ai et al., 2022; Iketani et al., 2022; Zhou et al., 2022)), S: <b>406D</b> (51 ), S: <b>406W</b> (84 (Starr et al., 2021)), S:417E (165 (Baum et al., 2020)), S:417R (61 (Baum et al., 2020)), S:417N (40 (Du et al., 2022; FDA, 2022; Liu et al., 2021; Tada et al., 2021a; Tada et al., 2022a; Tada et al., 2022b; Wang et al., 2021b; Wang et al., 2021c; Wang et al., 2021d)), S:417R (61 ) S:417T (7.1 (Wang et al., 2021c)), S:417V (26 (Thomson et al., 2020)), S:445T (107 ), S: <b>453F</b> (>438 (Baum et al., 2020; Hoffmann et al., 2021; Tada et al., 2021a; Wang et al., 2021a; Yao et al., 2021)), S: <b>455F</b> (4.6 (Baum et al., 2020; Copin et al., 2021)), S:475R (342 (Wang et al., 2021a)), S:484A (9 (Ai et al., 2022; Liu et al., 2021; Tada et al., 2022a)), S:484K (53 (Baum et al., 2020; Du et al., 2022; Tada et al., 2021a; Tada et al., 2021b; Tada et al., 2022b; Wang et al., 2021d; Yuan et al., 2021)), S:484Q (19 (Du et al., 2022; Tada et al., 2021b)), S:486K (> 938 (Starr et al., 2021)), S:486L (61 (Copin et al., 2021; Wang et al., 2021c)), S:486R (>10,000 (Wang et al., 2021a)), S:486S (>269 (Tada et al., 2021a)), S:486V (>439 (Copin et al., 2021; Wang et al., 2022a)), S:487R (>10,000 (Wang et al., 2021a)), S:493E (446 (FDA, |



|              |                                                                                                                                                                                                                                                                                                                                                                                                                                                                                                                                                                                                                                                                                                                              |
|--------------|------------------------------------------------------------------------------------------------------------------------------------------------------------------------------------------------------------------------------------------------------------------------------------------------------------------------------------------------------------------------------------------------------------------------------------------------------------------------------------------------------------------------------------------------------------------------------------------------------------------------------------------------------------------------------------------------------------------------------|
|              | 2022)), S:493K (>438 (Baum et al., 2020; FDA, 2022; Nabel et al., 2022; Tada et al., 2022a)), S:493R (42 (Ai et al., 2022; Du et al., 2022; Liu et al., 2021; Nabel et al., 2022))                                                                                                                                                                                                                                                                                                                                                                                                                                                                                                                                           |
| imdevimab    | S:371F (87 (Ai et al., 2022; Iketani et al., 2022; Zhou et al., 2022)), S:371L (12 (Ai et al., 2022; Liu et al., 2021; Tada et al., 2022a; Wang et al., 2022c)), S:373P (5.9 (Tada et al., 2022a)), S: <b>406W</b> (108 b (Starr et al., 2021)), S:439K (28 (FDA, 2022)), S:440K (9.9 (Wang et al., 2022c)), S:444L (153 (FDA, 2022)), S:444M (>1000 (FDA, 2022)), S:444N (>755 (FDA, 2022)), S:444Q (>857 (FDA, 2022)), S:444T (>1000 (FDA, 2022)), S:445A (548 (FDA, 2022)), S: <b>446S</b> (sw1q574 (Wang et al., 2022c)), S: <b>446V</b> (135 (FDA, 2022)), S:450D (9 (FDA, 2022)), S:498H (17 (FDA, 2022)), S:498R (3 (Ai et al., 2022)), S:499S (206 (FDA, 2022))                                                      |
| bamlanivimab | S:452R (>1000 (Wang et al., 2021a; Wang et al., 2022a)), S: <b>484A</b> (>357 (Zhou et al., 2021)), S: <b>484D</b> (>100 (FDA)), S: <b>484K</b> (>1000 (Annavaiah et al., 2021)), S: <b>484Q</b> (>100 (Gottlieb et al., 2021)), S:486R (166 (Wang et al., 2021a)), S:486V (490 (Wang et al., 2022a)), S:490L (>1000 (Wang et al., 2022a)), S:490S (>100 (Gottlieb et al., 2021)), S:493H (14 (EMA, 2021)), S:493K (>357 (Nabel et al., 2022)), S:493L (9.9 (EMA, 2021)), S: <b>493R</b> (>1000 (EMA, 2021; Nabel et al., 2022)), S: <b>494P</b> (>100 (EMA, 2021; Gottlieb et al., 2021)), S:494R (>1000 (Wang et al., 2021a))                                                                                              |
| etesevimab   | S:371F (143 (Ai et al., 2022)), S:371L (19 (Ai et al., 2022)), S:417N (>227), S:417T (>49 (Wang et al., 2021c)), S:420N (>21 (EMA, 2021)), S:456A (15 (Greaney et al., 2021)), S:456K (>33 (Greaney et al., 2021)), S:456R (>382 (Wang et al., 2021a)), S:460K (>100 (EMA, 2021)), S:460S (>100 (EMA, 2021)), S:460T (>100 (EMA, 2021)), S:460Y (>132 (EMA, 2021)), S:475R (>382 (Wang et al., 2021a)), S:475V (17 (Yi, 2020)), S:486L (7 (Wang et al., 2021c; Yi et al., 2021)), S:486R (18 (Wang et al., 2021a)), S:486V (11 (Wang et al., 2022a)), S:487R (>382 (Wang et al., 2021a)), S:493K (27 (Nabel et al., 2022)), S:493L (3.3 (EMA, 2021)), S: <b>493R</b> (44 (Ai et al., 2022; EMA, 2021; Nabel et al., 2022)),) |
| regdanvimab  | S: 452R (35 (Ryu et al., 2021)), S:484K (8.7 (Ryu et al., 2021)), S:493R (> 949 (Ai et al., 2022))                                                                                                                                                                                                                                                                                                                                                                                                                                                                                                                                                                                                                           |

**Table 2.** Published reports of anti-Spike mAb treatment-emergent resistance.

| mAb(s)                                            | N (of n) cases                                      | SARS-CoV-2 strain     | Spike mutations                            | Ref                                                                                  |
|---------------------------------------------------|-----------------------------------------------------|-----------------------|--------------------------------------------|--------------------------------------------------------------------------------------|
| bamlanivimab monotherapy (700 mg iv)              | 7 out of 101 (6.9%) immunocompetent patients        | n.a.                  | E484K/Q, S494P                             | Choudhary <i>et al</i> (Boucau <i>et al.</i> , 2022; Choudhary <i>et al.</i> , 2022) |
|                                                   | 1 immunocompromised patient                         | Alpha                 | E484K, Q493R                               | Truffot <i>et al</i> (Truffot <i>et al.</i> , 2021)                                  |
|                                                   | 1 immunocompromised patient                         | Alpha                 | E484K, Q493R, S494P                        | Lohr <i>et al</i> (Lohr <i>et al.</i> , 2021)                                        |
|                                                   | 5 out of 6 (83.3%) immunocompromised patients       | B.1                   | E484K → E484Q, reverted to E484K after CCP | Jensen <i>et al</i> (Jensen <i>et al.</i> , 2021)                                    |
|                                                   | 1 immunocompromised patient                         | Alpha                 | E484Q                                      | Bronstein <i>et al</i> (Bronstein <i>et al.</i> , 2021)                              |
|                                                   | 2 immunocompromised patients                        | 20B/20G               | E484Q/K                                    | Simons <i>et al</i> (Simons <i>et al.</i> , 2022)                                    |
|                                                   | 1 immunocompetent patient                           | B.1.311               | E484K                                      | Sabin <i>et al</i> (Sabin <i>et al.</i> , 2022)                                      |
|                                                   | 1 immunocompromised patient                         | B.1.2                 | E484T                                      | Halfmann <i>et al</i> (Halfmann <i>et al.</i> , 2022)                                |
|                                                   | 2 immunocompromised patients                        | 20A.EU2 / 20I/501Y.V1 | E484A/K                                    | Destras <i>et al</i> (Destras <i>et al.</i> , 2021)                                  |
|                                                   | 2 immunocompromised patients                        |                       | E484Q/K, Q493R                             | Scherer <i>et al</i> (Scherer <i>et al.</i> , 2022)                                  |
|                                                   | 5 out of 45 (11.1%)                                 | Alpha                 | E484A/K, Q493R, S494P                      | Gupta <i>et al</i> (Gupta <i>et al.</i> , 2023)                                      |
|                                                   | 1 out of 2 (50%) immunocompetent                    | B.1.214.2 Alpha       | Q493R                                      | Jary <i>et al</i> (Jary <i>et al.</i> , 2022)                                        |
|                                                   | 5 out of 6 (83.3%)                                  | Alpha                 | E484A/K, Q493R, S494P                      | Peiffer-Smadja <i>et al</i> (Peiffer-Smadja <i>et al.</i> , 2021)                    |
|                                                   |                                                     |                       |                                            |                                                                                      |
| bamlanivimab 700 mg + etesevimab 1400 mg cocktail | 1 out of 102 (1%) patients                          | B.*                   | S494P                                      | Gottlieb <i>et al</i> (Gottlieb <i>et al.</i> , 2021)                                |
|                                                   | 1 immunocompromised patient                         | Alpha                 | Q493R                                      | Focosi <i>et al</i> (Focosi <i>et al.</i> , 2021)                                    |
|                                                   | 1 immunocompromised patient                         |                       | Q493R                                      | Guigon <i>et al</i> (Guigon <i>et al.</i> , 2021)                                    |
|                                                   | 5 out of 23 (21.7%) patients (17 immunocompromised) |                       | E484K, Q493R                               | Vellas <i>et al</i> (Vellas <i>et al.</i> , 2021)                                    |
|                                                   | 3 out of 108 (2.8%)                                 |                       | E484D, Q493R/K                             | Gupta <i>et al</i> (Gupta <i>et al.</i> , 2023)                                      |
|                                                   | 1 out of 3 (33%)                                    |                       | Q493R                                      | Jary <i>et al</i> (Jary <i>et al.</i> , 2022)                                        |
|                                                   | 5 out of 34 (14.7) patients                         |                       | Q493R, E484D                               | Pommeret <i>et al</i>                                                                |

|                                                      |                                                                      |                                                  |                                    |                                                                                   |
|------------------------------------------------------|----------------------------------------------------------------------|--------------------------------------------------|------------------------------------|-----------------------------------------------------------------------------------|
|                                                      | (5 with B-cell malignancies)                                         |                                                  |                                    | (Pommeret et al., 2021)                                                           |
| casirivimab +<br>imdevimab<br>(REGN-CoV)<br>cocktail | 1 immunocompromised patient                                          | n.a.                                             | E484K/A, Y489H, Q493K and N501Y    | Choi <i>et al</i> (Choi et al., 2020)<br>Clarke <i>et al</i> (Clark et al., 2021) |
|                                                      | 0 out of 8 (0%)                                                      | Alpha (7) and Gamma (1)                          | -                                  | Jary <i>et al</i> (Jary et al., 2022)                                             |
|                                                      | 1 out of 17 (5.9%)                                                   | Alpha                                            | E406G                              | Gupta <i>et al</i> (Gupta et al., 2023)                                           |
|                                                      | 15 out of 160 (9.4%)                                                 | Delta, BA.1                                      | E406D/Q, G446S/V, Y453F, L455F/S   | Ragonnet-Cronin <i>et al</i> (Ragonnet-Cronin et al., 2022)                       |
| sotrovimab                                           | 4 cases out of 100 (4%)                                              | Delta                                            | E340K/A/V                          | Rockett <i>et al</i> (Rockett et al., 2021)                                       |
|                                                      | 10 cases out of 18 (55.6%) (15 immunocompromised)                    | BA.1 (94%)<br>BA.2 (6%)                          | E340K/A/V/D/G/Q, P337L/R/S         | Birnie <i>et al</i> (Birnie et al., 2022)                                         |
|                                                      | 3 out of 16 (18.8%) immunocompromised patients                       | 2 BA.1, 1 BA.2                                   | E340D                              | Focosi <i>et al</i> (Focosi et al., 2022b)                                        |
|                                                      | 18 out of 34 (52.9%) immunocompromised patients                      | 17 BA.1<br>1 BA.2                                | P337L/S, E340A/K/D/G, K356T, S371F | Vellas <i>et al</i> (Vellas et al., 2022b)                                        |
|                                                      | 4 of 25 (16%) BA.1-infected patients<br>2 of 7 (28.6%) BA.2-infected | BA.1<br>BA.2                                     | P337X, E340X                       | Huygens <i>et al</i> (Huygens et al., 2022)                                       |
|                                                      | 5 out of 8 (62.5%) immunocompromised                                 | BA.1 (7)<br>AY.100 (1)                           | P337L, E340D/R/K/V/Q, R346T, K356T | Andrés <i>et al</i> (Andrés et al., 2023)                                         |
|                                                      | 8 patients                                                           | BA.1                                             | P337R/S, E340A/D/K/Q               | Destras <i>et al</i> (Destras et al., 2022)                                       |
|                                                      | 9 out of 34 (26.5%)                                                  | BA.1.1.* (n=14)<br>BA.1 (n = 13)<br>BA.2 (n = 7) | E340K/D/V                          | Gupta <i>et al</i> (Gupta et al., 2023)                                           |
|                                                      | 54 out of 134 (40.3%) patients                                       | Delta, BA.1, BA.2                                | P337R/S, E340A/D/K/V, K356T        | Ragonnet-Cronin <i>et al</i> (Ragonnet-Cronin et al., 2022)                       |
|                                                      | 14 out of 43 (32.6%) patients                                        | BA.1                                             | P337S/H/L/R, E340K/D/V             | Gliga <i>et al</i> (Gliga et al., 2022)                                           |
| cilgavimab-<br>tixagevimab                           | 9 out of 18 (50%) immunocompromised cases                            | BA.2                                             | K444R/N, R346T, L452M              | Vellas <i>et al</i> (Vellas et al., 2022a)                                        |
|                                                      | 1 out 19 (5.3%) immunocompetent cases                                | BA.4/5                                           | K444N                              | Maggi <i>et al</i> (Fabeni et al., 2023)                                          |

|              |                             |         |       |                                                                |
|--------------|-----------------------------|---------|-------|----------------------------------------------------------------|
| bebtelovimab | 1 immunocompromised patient | BA.1.23 | V445A | Gonzalez-Reiche <i>et al</i><br>(Gonzalez-Reiche et al., 2022) |
|--------------|-----------------------------|---------|-------|----------------------------------------------------------------|

**Table 3.** Frequencies of treatment-emergent resistance

| mAb (n=number of cohort series) | # of patients developing treatment-emergent resistance mutations across all case series | total # of patients across all case series | percent of patients developing treatment-emergent resistance across all case series | number of additional single case reports |
|---------------------------------|-----------------------------------------------------------------------------------------|--------------------------------------------|-------------------------------------------------------------------------------------|------------------------------------------|
| bamlanivimab (n=5)              | 23                                                                                      | 160                                        | 14.4%                                                                               | 11                                       |
| bamlanivimab+etesevimab (n=5)   | 15                                                                                      | 270                                        | 5.6%                                                                                | 2                                        |
| casirivimab+imdevimab (n=3)     | 16                                                                                      | 185                                        | 8.6%                                                                                | 1                                        |
| sotrovimab (n=11)               | 131                                                                                     | 427                                        | 30.7%                                                                               | 0                                        |
| cilgavimab-tixagevimab (n=2)    | 10                                                                                      | 37                                         | 27.0%                                                                               | 0                                        |
| bebtelovimab (n=0)              | n.a.                                                                                    | n.a.                                       | n.a.                                                                                | 1                                        |
| Total                           | 195                                                                                     | 1079                                       | 18.1                                                                                | 15                                       |

## References

- ETF warns that monoclonal antibodies may not be effective against emerging strains of SARS-CoV-2. Accessed online at <https://www.ema.europa.eu/en/news/etf-warns-monoclonal-antibodies-may-not-be-effective-against-emerging-strains-sars-cov-2> on January 24, 2023.
- Fact sheet for healthcare providers emergency use authorization (EUA) of sotrovimab. Accessed online at <https://www.fda.gov/media/149534/download> on February 22, 2023.
- Fact sheet for healthcare providers: emergency use authorization for bebtelovimab. Accessed online at <https://www.fda.gov/media/156152/download> on February 21, 2022.
- FDA authorizes revisions to fact sheets to address SARS-CoV-2 variants for monoclonal antibody products under emergency use authorization. Accessed online at [14](https://www.fda.gov/drugs/drug-safety-and-availability/fda-authorizes-revisions-fact-sheets-address-sars-cov-2-variants-monoclonal-antibody-products-under#:~:text=Today%2C%20the%20U.S.%20Food%20and,for%20the%20treatment%20of%20COVID%2D on February 22, 2023.</a></p>
<p>Regeneron Ireland DAC use of casirivimab and imdevimab for the treatment of COVID-19.</p>
<p>J. Ai, X. Wang, X. He, X. Zhao, Y. Zhang, Y. Jiang, M. Li, Y. Cui, Y. Chen, R. Qiao, L. Li, L. Yang, Y. Li, Z. Hu, W. Zhang and P. Wang, Antibody evasion of SARS-CoV-2 Omicron BA.1, BA.1.1, BA.2, and BA.3 sub-lineages, <i>Cell host & microbe</i> <b>30</b> (2022), pp. 1077-1083.e1074.</p>
<p>T.S. Anderson, A. O'Donoghue, O. Mechanic, T. Dechen and J. Stevens, Administration of Anti-SARS-CoV-2 Monoclonal Antibodies After US Food and Drug Administration Deauthorization, <i>JAMA Network Open</i> <b>5</b> (2022), pp. e2228997-e2228997.</p>
<p>C. Andrés, A. González-Sánchez, M. Jiménez, E. Márquez-Algaba, M. Piñana, C. Fernández-Naval, J. Esperalba, N. Saubi, J. Quer, A. Rando-Segura, M. Miarons, M.G. Codina, I. Ruiz-Camps, T. Pumarola, P. Abrisqueta and A. Antón, Emergence of Delta and Omicron variants carrying resistance-associated mutations in immunocompromised patients undergoing sotrovimab treatment with long-term viral excretion, <i>Clinical Microbiology and Infection</i> <b>29</b> (2023), pp. 240-246.</p>
<p>M.K. Annavajhala, H. Mohri, P. Wang, M. Nair, J.E. Zucker, Z. Sheng, A. Gomez-Simmonds, A.L. Kelley, M. Tagliavia, Y. Huang, T. Bedford, D.D. Ho and A.-C. Uhlemann, Emergence and expansion of SARS-CoV-2 B.1.526 after identification in New York, <i>Nature</i> <b>597</b> (2021), pp. 703-708.</p>
<p>A. Baum, B.O. Fulton, E. Wloga, R. Copin, K.E. Pascal, V. Russo, S. Giordano, K. Lanza, N. Negron, M. Ni, Y. Wei, G.S. Atwal, A.J. Murphy, N. Stahl, G.D. Yancopoulos and C.A. Kyratsous, Antibody cocktail to SARS-CoV-2 spike protein prevents rapid mutational escape seen with individual antibodies, <b>369</b> (2020), pp. 1014-1018.</p>
<p>E. Birnie, J.J. Biemond, B. Appelman, G.J. de Bree, M. Jonges, M.R.A. Welkers and W.J. Wiersinga, Development of Resistance-Associated Mutations After Sotrovimab Administration in High-risk Individuals Infected With the SARS-CoV-2 Omicron Variant, <i>Jama</i> <b>328</b> (2022), pp. 1104-1107.</p>
<p>J. Boucau, K.W. Chew, M.C. Choudhary, R. Deo, J. Regan, J.P. Flynn, C.R. Crain, M.D. Hughes, J. Ritz, C. Moser, J.A. Dragavon, A.C. Javan, A. Nirula, P. Klekotka, A.L. Greninger, R.W. Coombs, W.A. Fischer, E.S. Daar, D.A. Wohl, J.J. Eron, J.S. Currier, D.M. Smith, J.Z. Li and A.K. Barczak, Monoclonal antibody treatment drives rapid culture conversion in SARS-CoV-2 infection, <i>Cell Reports Medicine</i> <b>3</b> (2022), p. 100678.</p>
<p>Y. Bronstein, A. Adler, H. Katash, O. Halutz, H. Y and K. Levytskyi, Evolution of spike mutations following antibody treatment in two immunocompromised patients with persistent COVID-19 infection, <i>Journal of medical virology</i> (2021).</p>
<p>Y. Cao, F. Jian, J. Wang, Y. Yu, W. Song, A. Yisimayi, J. Wang, R. An, N. Zhang, Y. Wang, P. Wang, L. Zhao, H. Sun, L. Yu, S. Yang, X. Niu, T. Xiao, Q. Gu, F. Shao, X. Hao, Y. Xu, R. Jin, Y. Wang and X.S. Xie, Imprinted</p>
</div>
<div data-bbox=)

- SARS-CoV-2 humoral immunity induces convergent Omicron RBD evolution, *Nature* (2022), p. 2022.2009.2015.507787.
- A. Casadevall and D. Focosi, SARS-CoV-2 variants resistant to monoclonal antibodies in immunocompromised patients is a public health concern, *The Journal of clinical investigation* (2023).
- A.L. Cathcart, C. Havenar-Daughton, F.A. Lempp, D. Ma, M. Schmid, M.L. Agostini, B. Guarino, J. Di iulio, L. Rosen, H. Tucker, J. Dillen, S. Subramanian, B. Sloan, S. Bianchi, J. Wojcechowskyj, J. Zhou, H. Kaiser, A. Chase, M. Montiel-Ruiz, N. Czudnochowski, E. Cameroni, S. Ledoux, C. Colas, L. Soriaga, A. Telenti, S. Hwang, G. Snell, H.W. Virgin, D. Corti and C.M. Hebner, The dual function monoclonal antibodies VIR-7831 and VIR-7832 demonstrate potent in vitro and in vivo activity against SARS-CoV-2, (2021), p. 2021.2003.2009.434607.
- C. Chen, S. Nadeau, M. Yared, P. Voinov, N. Xie, C. Roemer and T. Stadler, CoV-Spectrum: analysis of globally shared SARS-CoV-2 data to identify and characterize new variants, *Bioinformatics* **38** (2021a), pp. 1735-1737.
- R.E. Chen, X. Zhang, J.B. Case, E.S. Winkler, Y. Liu, L.A. VanBlargan, J. Liu, J.M. Errico, X. Xie, N. Suryadevara, P. Gilchuk, S.J. Zost, S. Tahan, L. Droit, J.S. Turner, W. Kim, A.J. Schmitz, M. Thapa, D. Wang, A.C.M. Boon, R.M. Presti, J.A. O'Halloran, A.H.J. Kim, P. Deepak, D. Pinto, D.H. Fremont, J.E. Crowe, Jr., D. Corti, H.W. Virgin, A.H. Ellebedy, P.Y. Shi and M.S. Diamond, Resistance of SARS-CoV-2 variants to neutralization by monoclonal and serum-derived polyclonal antibodies, *Nat Med* **27** (2021b), pp. 717-726.
- B. Choi, M.C. Choudhary, J. Regan, J.A. Sparks, R.F. Padera, X. Qiu, I.H. Solomon, H.-H. Kuo, J. Boucau, K. Bowman, U.D. Adhikari, M.L. Winkler, A.A. Mueller, T.Y.-T. Hsu, M. Desjardins, L.R. Baden, B.T. Chan, B.D. Walker, M. Lichterfeld, M. Brigl, D.S. Kwon, S. Kanjilal, E.T. Richardson, A.H. Jonsson, G. Alter, A.K. Barczak, W.P. Hanage, X.G. Yu, G.D. Gaiha, M.S. Seaman, M. Cernadas and J.Z. Li, Persistence and Evolution of SARS-CoV-2 in an Immunocompromised Host, **383** (2020), pp. 2291-2293.
- M.C. Choudhary, K.W. Chew, R. Deo, J.P. Flynn, J. Regan, C.R. Crain, C. Moser, M.D. Hughes, J. Ritz, R.M. Ribeiro, R. Ke, J.A. Dragavon, A.C. Javan, A. Nirula, P. Klekotka, A.L. Greninger, C.V. Fletcher, E.S. Daar, D.A. Wohl, J.J. Eron, J.S. Currier, U.M. Parikh, S.F. Sieg, A.S. Perelson, R.W. Coombs, D.M. Smith, J.Z. Li, D. Smith, A.C. Javan, M. Giganti, L. Hosey, J. Roa, N. Patel, K. Colsh, I. Rwakazina, J. Beck, S. Sieg, W. Fischer, T. Evering, R.B. Ignacio, S. Cardoso, K. Corado, P. Jagannathan, N. Jilg, S. Pillay, C. Riviere, U. Singh, B. Taiwo, J. Gottesman, M. Newell, S. Pedersen, J. Dragavon, C. Jennings, B. Greenfelder, W. Murtaugh, J. Kosmyna, M. Gapara, A. Shahkolahi and A.-A.S.T. for the, Emergence of SARS-CoV-2 escape mutations during Bamlanivimab therapy in a phase II randomized clinical trial, *Nature Microbiology* **7** (2022), pp. 1906-1917.
- S.A. Clark, L.E. Clark, J. Pan, A. Coscia, L.G.A. McKay, S. Shankar, R.I. Johnson, V. Brusic, M.C. Choudhary, J. Regan, J.Z. Li, A. Griffiths and J. Abraham, SARS-CoV-2 evolution in an immunocompromised host reveals shared neutralization escape mechanisms, *Cell* **184** (2021), pp. 2605-2617.e2618.
- R. Copin, A. Baum, E. Wloga, K.E. Pascal, S. Giordano, B.O. Fulton, A. Zhou, N. Negron, K. Lanza, N. Chan, A. Coppola, J. Chiu, M. Ni, G.S. Atwal, A. Romero Hernandez, K. Saotome, Y. Zhou, M.C. Franklin, A.T. Hooper, S. McCarthy, S. Hamon, J.D. Hamilton, H.M. Staples, K. Alfson, R. Carrion, S. Ali, T. Norton, S. Somersan-Karakaya, S. Sivapalasingam, G.A. Herman, D.M. Weinreich, L. Lipsich, N. Stahl, A.J. Murphy, G.D. Yancopoulos and C.A. Kyratsous, The monoclonal antibody combination REGEN-COV protects against SARS-CoV-2 mutational escape in preclinical and human studies, *Cell* **184** (2021), pp. 3949-3961.
- G. Destras, S. Assaad, A. Bal, M. Bouscambert-Duchamp, V. Avrillon, B. Simon, M. Valette, J.-Y. Blay, B. Lina, E. Frobert and L. Josset, Bamlanivimab as monotherapy in two immunocompromised patients with COVID-19, *The Lancet Microbe* **2** (2021), p. e424.
- G. Destras, A. Bal, B. Simon, B. Lina and L. Josset, Sotrovimab drives SARS-CoV-2 Omicron variant evolution in immunocompromised patients, *The Lancet. Microbe* **3** (2022), p. E559.

W. Du, D.L. Hurdiss, D. Drabek, A.Z. Mykytyn, F. Kaiser, M. Gonzalez-Hernandez, D. Munoz-Santos, M.M. Lamers, R. van Haperen, W. Li, I. Drulyte, C. Wang, I. Sola, F. Armando, G. Beythien, M. Ciurkiewicz, W. Baumgartner, K. Guilfoyle, T. Smits, J. van der Lee, F.J.M. van Kuppeveld, G. van Amerongen, B.L. Haagmans, L. Enjuanes, A.D. Osterhaus, F. Grosveld and B.J. Bosch, An ACE2-blocking antibody confers broad neutralization and protection against Omicron and other SARS-CoV-2 variants, (2022), p. 2022.2002.2017.480751.

EMA, Eli Lilly and Company Limited use of bamlanivimab and etesevimab for the treatment of COVID-19, (2021).

L. Fabeni, C.E. Gruber, F. Tucci, V. Mazzotta, M. Rueca, G. Gramigna, A. Vergori, E. Giombini, O. Butera, D. Focosi, E. Nicastri, E. Girardi, F. Vaia, A. Antinori and F. Maggi, Treatment-emergent cilgavimab resistance in Omicron BA.4/5, *Drug Resistance Updates* (2023).

FDA, Fact sheet for healthcare providers: emergency use authorization for Evusheld™ (tixagevimab co-packaged with cilgavimab). Accessed online at <https://www.fda.gov/media/154701/download> on February 3, 2023, (2021).

FDA, FDA authorizes revisions to Evusheld dosing. Accessed online on April 29, 2022 at <https://www.fda.gov/drugs/drug-safety-and-availability/fda-authorizes-revisions-evusheld-dosing>, (2022).

FDA, FDA authorizes revisions to fact sheets to address SARS-CoV-2 variants for monoclonal antibody products under emergency use authorization. Accessed online at <https://www.fda.gov/drugs/drug-safety-and-availability/fda-authorizes-revisions-fact-sheets-address-sars-cov-2-variants-monoclonal-antibody-products-under> on February 27, 2023.

D. Focosi, A web tool to estimate baseline anti-Spike monoclonal antibody efficacy based on regional genomic surveillance, *submitted* (2023).

D. Focosi, S. McConnell, A. Casadevall, E. Cappello, G. Valdiserra and M. Tuccori, Monoclonal antibody therapies against SARS-CoV-2, *The Lancet Infectious Diseases* **22** (2022a), pp. 00311-00315.

D. Focosi, F. Novazzi, A. Baj, F.D. Ferrante, S. Boutahar, A.P. Genoni, D.D. Gasperina and F. Maggi, Sotrovimab-emergent resistance in SARS-CoV-2 Omicron: A series of three cases, *J Clin Virol Plus* **2** (2022b), p. 100097.

D. Focosi, F. Novazzi, A. Genoni, F. Dentali, D. Dalla Gasperina, A. Baj and F. Maggi, Daniele Focosi, Federica Novazzi, Angelo Genoni, Francesco Dentali, Daniela Dalla gasperina, Andreina Baj, Fabrizio Maggi, (2021).

D. Focosi, R. Quiroga, S. McConnell, M.C. Johnson and A. Casadevall, Convergent evolution in SARS-CoV-2 Spike creates a variant soup from which new COVID-19 waves emerge, *International Journal of Molecular Sciences* **24** (2023), p. 2264.

D. Focosi and M. Tuccori, Prescription of Anti-Spike Monoclonal Antibodies in COVID-19 Patients with Resistant SARS-CoV-2 Variants in Italy, *Pathogens (Basel, Switzerland)* **11** (2022).

S. Gliga, N. Luebke, A. Killer, H. Gruell, A. Walker, A.T. Dilthey, C. Lohr, C. Flaßhove, H.M. Orth, T. Feldt, J.G. Bode, F. Klein, J. Timm, T. Luedde and B.O. Jensen, Rapid selection of sotrovimab escape variants in SARS-CoV-2 Omicron infected immunocompromised patients, *Clinical Infectious Diseases* (2022).

R.L. Gottlieb, A. Nirula, P. Chen, J. Boscia, B. Heller, J. Morris, G. Huhn, J. Cardona, B. Mocherla, V. Stosor, I. Shawa, P. Kumar, A.C. Adams, J. Van Naarden, K.L. Custer, M. Durante, G. Oakley, A.E. Schade, T.R. Holzer, P.J. Ebert, R.E. Higgs, N.L. Kallewaard, J. Sabo, D.R. Patel, P. Klekotka, L. Shen and D.M. Skovronsky, Effect of Bamlanivimab as Monotherapy or in Combination With Etesevimab on Viral Load in Patients With Mild to Moderate COVID-19: A Randomized Clinical Trial, *JAMA* **325** (2021), pp. 632-644.

A.J. Greaney, A.N. Loes, K.H. Crawford, T.N. Starr, K.D. Malone, H.Y. Chu and J.D. Bloom, Comprehensive mapping of mutations to the SARS-CoV-2 receptor-binding domain that affect recognition by polyclonal human serum antibodies, *bioRxiv [Preprint]* (2021).



- A. Guigon, E. Faure, C. Lemaire, M. Chopin, C. Tinez, A. Assaf, M. Lazrek, D. Hober, L. Bocket, I. Engelmann and E. Kazali Alidjinou, Emergence of Q493R mutation in SARS-CoV-2 spike protein during bamlanivimab/etesevimab treatment and resistance to viral clearance, *J Infect* **S0163-4453** (2021), pp. 00435-00437.
- A. Gupta, A. Konnova, M. Smet, M. Berkell, A. Savoldi, M. Morra, V. Van Averbek, F. De Winter, D. Peserico, E. Danese, A. Hotterbeekx, E. Righi, m.O.w. group, P. De Nardo, E. Tacconelli, S. Malhotra-Kumar and S. Kumar-Singh, Host immunological responses facilitate development of SARS-CoV-2 2 mutations in patients receiving monoclonal antibody treatments, *The Journal of clinical investigation* (2023).
- P.J. Halfmann, N.R. Minor, L.A. Haddock III, R. Maddox, G.K. Moreno, K.M. Braun, D.A. Baker, K.K. Riemersa, A. Prasad, K.J. Alman, M.C. Lambert, K. Florek, A. Bateman, R. Westergaard, N. Safdar, D.R. Andes, Y. Kawaoka, M. Fida, J.D. Yao, T.C. Friedrich and D.H. O'Connor, Evolution of a globally unique SARS-CoV-2 Spike E484T monoclonal antibody escape mutation in a persistently infected, immunocompromised individual, *Virus Evolution* (2022).
- K. Harman, S.G. Nash, H.H. Webster, N. Groves, J. Hardstaff, J. Bridgen, P.B. Blomquist, R. Hope, E. Ashano, R. Myers, S. Rokadiya, S. Hopkins, C.S. Brown, M. Chand, G. Dabrera and S. Thelwall, Comparison of the risk of hospitalisation among BA.1 and BA.2 COVID-19 cases treated with Sotrovimab in the community in England, (2022), p. 2022.2010.2021.22281171.
- M. Hoffmann, L. Zhang, N. Krüger, L. Graichen, H. Kleine-Weber, H. Hofmann-Winkler, A. Kempf, S. Nessler, J. Riggert, M.S. Winkler, S. Schulz, H.-M. Jäck and S. Pöhlmann, SARS-CoV-2 mutations acquired in mink reduce antibody-mediated neutralization, (2021), p. 2021.2002.2012.430998.
- R.V. House, T.A. Broge, T.J. Suscovich, D.M. Snow, M.T. Tomic, G. Nonet, K. Bajwa, G. Zhu, Z. Martinez, K. Hackett, C.G. Earnhart, N.M. Dorsey, S.A. Hopkins, D.S. Natour, H.D. Davis, M.S. Anderson, M.R. Gainey and R.R. Cobb, Evaluation of strategies to modify Anti-SARS-CoV-2 monoclonal antibodies for optimal functionality as therapeutics, *PloS one* **17** (2022), p. e0267796.
- S. Huygens, B.O. Munnink, A. Gharbharan, M. Koopmans and B. Rijnders, Sotrovimab resistance and viral persistence after treatment of immunocompromised patients infected with the SARS-CoV-2 Omicron variant, *Clinical Infectious Diseases* (2022).
- S. Iketani, L. Liu, Y. Guo, L. Liu, Y. Huang, M. Wang, Y. Luo, J. Yu, M.T. Yin, M.E. Sobieszczyk, Y. Huang, H.H. Wang, Z. Sheng and D.D. Ho, Antibody Evasion Properties of SARS-CoV-2 Omicron Sublineages, *Nature* **604** (2022), pp. 553-556.
- A. Jary, S. Marot, A. Faycal, S. Leon, S. Sayon, K. Zafilaza, E. Ghidaoui, S.N. Quoc, S. Nemlaghi, S. Choquet, M. Dres, V. Pourcher, V. Calvez, H. Junot, A.G. Marcelin and C. Soulié, Spike Gene Evolution and Immune Escape Mutations in Patients with Mild or Moderate Forms of COVID-19 and Treated with Monoclonal Antibodies Therapies, *Viruses* **14** (2022).
- B. Jensen, N. Luebke, T. Feldt, V. Keitel, T. Brandenburger, D. Kindgen-Milles, M. Lutterbeck, N.F. Freise, D. Schoeler, R. Haas, A. Dilthey, O. Adams, A. Walker, J. Timm and T. Luedde, Emergence of the E484K mutation in SARS-COV-2-infected immunocompromised patients treated with bamlanivimab in Germany, *The Lancet Regional Health – Europe* **8** (2021).
- L. Liu, S. Iketani, Y. Guo, J.F.-W. Chan, M. Wang, L. Liu, Y. Luo, H. Chu, Y. Huang, M.S. Nair, J. Yu, K.K.-H. Chik, T.T.-T. Yuen, C. Yoon, K.K.-W. To, H. Chen, M.T. Yin, M.E. Sobieszczyk, Y. Huang, H.H. Wang, Z. Sheng, K.-Y. Yuen and D.D. Ho, Striking Antibody Evasion Manifested by the Omicron Variant of SARS-CoV-2, (2021), p. 2021.2012.2014.472719.
- B. Lohr, D. Niemann and J. Verheyen, Bamlanivimab treatment leads to rapid selection of immune escape variant carrying E484K mutation in a B.1.1.7 infected and immunosuppressed patient, *Clinical Infectious Diseases* (2021).
- K.G. Nabel, S.A. Clark, S. Shankar, J. Pan, L.E. Clark, P. Yang, A. Coscia, L.G.A. McKay, H.H. Varnum, V. Brusic, N.V. Tolan, G. Zhou, M. Desjardins, S.E. Turbett, S. Kanjilal, A.C. Sherman, A. Dighe, R.C. LaRocque,

- E.T. Ryan, C. Tylek, J.F. Cohen-Solal, A.T. Darcy, D. Tavella, A. Clabbers, Y. Fan, A. Griffiths, I.R. Correia, J. Seagal, L.R. Baden, R.C. Charles and J. Abraham, Structural basis for continued antibody evasion by the SARS-CoV-2 receptor binding domain, **375** (2022), p. eabl6251.
- V. Patel, B. Levick, S. Boulton, D.C. Gibbons, M. Drysdale, E.J. Lloyd, M. Singh and H.J. Birch, Characteristics and Outcomes of COVID-19 Patients Presumed to be Treated with Sotrovimab in NHS Hospitals in England, (2023), p. 2023.2002.2008.23285654.
- N. Peiffer-Smadja, A. Bridier-Nahmias, V.M. Ferré, C. Charpentier, M. Garé, C. Rioux, A. Allemand, P. Lavallée, J. Ghosn, L. Kramer, D. Descamps, Y. Yazdanpanah and B. Visseaux, Emergence of E484K Mutation Following Bamlanivimab Monotherapy among High-Risk Patients Infected with the Alpha Variant of SARS-CoV-2, *Viruses* **13** (2021).
- F. Pommeret, J. Colomba, C. Bigenwald, A. Laparra, S. Bockel, A. Bayle, J.M. Michot, T. Hueso, L. Albiges, P. Tiberghien, S. Marot, A. Jary, K. Lacombe, F. Barlesi, F. Griscelli and E. Colomba, Bamlanivimab+ etesevimab therapy induces SARS-CoV-2 immune escape mutations and secondary clinical deterioration in COVID-19 patients with B-cell malignancies, *Annals of Oncology* (2021).
- M. Ragonnet-Cronin, R. Nutalai, J. Huo, A. Djokaite-Guraliuc, R. Das, A. Tuekprakhon, P. Supasa, C. Liu, M. Selvaraj, N. Groves, H. Hartman, N. Ellaby, J.M. Sutton, M.W. Bahar, D. Zhou, E. Fry, J. Ren, C. Brown, P. Klenerman, S.J. Dunachie, J. Mongkolsapaya, S. Hopkins, M. Chand, D.I. Stuart, G.R. Screaton and S. Rokadiya, Genome-first detection of emerging resistance to novel therapeutic agents for SARS-CoV-2, *bioRxiv* (2022), p. 2022.2007.2014.500063.
- R.J. Rockett, K. Basile, S. Maddocks, W. Fong, J.E. Agius, J. Johnson-Mackinnon, A. Arnott, S. Chandra, M. Gall, J.L. Draper, E. Martinez, E.M. Sim, C. Lee, C. Ngo, M. Ramsperger, A.N. Ginn, Q. Wang, M. Fennell, D. Ko, L. Lim, N. Gilroy, M.V. Sullivan, S.C.-A. Chen, J. Kok, D.E. Dwyer and V.L. Sintchenko, Resistance mutations in SARS-CoV-2 Delta variant after sotrovimab use, *N Engl J Med* **386** (2021), pp. 1477-1479.
- D.-K. Ryu, H.-M. Woo, B. Kang, H. Noh, J.-I. Kim, J.-M. Seo, C. Kim, M. Kim, J.-W. Kim, N. Kim, P. Jeon, H. Lee, J.-S. Yang, K.-C. Kim, J.-Y. Lee, M.-H. Lee, S.-S. Oh, H.-Y. Chung, K.-S. Kwon and S.-Y. Lee, The in vitro and in vivo potency of CT-P59 against Delta and its associated variants of SARS-CoV-2, (2021), p. 2021.2007.2023.453472.
- A.P. Sabin, C.S. Richmond and P.A. Kenny, Emergence and onward transmission of a SARS-CoV-2 E484K variant among household contacts of a bamlanivimab-treated patient., *Diagn Microbiol Infect Dis* **103** (2022), p. 115656.
- E.M. Scherer, A. Babiker, M.W. Adelman, B. Allman, A. Key, J.M. Kleinhenz, R.M. Langsjoen, P.-V. Nguyen, I. Onyechi, J.D. Sherman, T.W. Simon, H. Soloff, J. Tarabay, J. Varkey, A.S. Webster, D. Weiskopf, D.B. Weissman, Y. Xu, J.J. Waggoner, K. Koelle, N. Rouphael, S.M. Pouch and A. Piantadosi, SARS-CoV-2 Evolution and Immune Escape in Immunocompromised Patients, **386** (2022), pp. 2436-2438.
- L.M. Simons, E.A. Ozer, S. Gambut, T.J. Dean, L. Zhang, P. Bhimalli, J.R. Schneider, J.I. Mamede, M.G. Ison, R. Karmali, L.I. Gordon, R. Lorenzo-Redondo and J.F. Hultquist, De novo emergence of SARS-CoV-2 spike mutations in immunosuppressed patients, *Transplant infectious disease : an official journal of the Transplantation Society* **24** (2022), p. e13914.
- E. Stadler, M.T. Burgess, T.E. Schlub, K.L. Chai, Z.K. McQuilten, E.M. Wood, M.N. Polizzotto, S.J. Kent, D. Cromer, M.P. Davenport and D.S. Khoury, Monoclonal antibody levels and protection from COVID-19, (2022a), p. 2022.2011.2022.22282199.
- E. Stadler, K.L. Chai, T.E. Schlub, D. Cromer, M.N. Polizzotto, S.J. Kent, C. Beecher, H. White, T. Turner, N. Skoetz, L. Estcourt, Z.K. McQuilten, E.M. Wood, D.S. Khoury and M.P. Davenport, Determinants of passive antibody efficacy in SARS-CoV-2 infection, (2022b), p. 2022.2003.2021.22272672.
- T.N. Starr, A.J. Greaney, A. Addetia, W.W. Hannon, M.C. Choudhary, A.S. Dingens, J.Z. Li and J.D. Bloom, Prospective mapping of viral mutations that escape antibodies used to treat COVID-19, *Science* (2021), p. eabf9302.

- T. Tada, B.M. Dcosta, M.I. Samanovic, R.S. Herati, A. Cornelius, H. Zhou, A. Vaill, W. Kazmierski, M.J. Mulligan and N.R. Landau, Convalescent-Phase Sera and Vaccine-Elicited Antibodies Largely Maintain Neutralizing Titer against Global SARS-CoV-2 Variant Spikes, *mBio* **12** (2021a), p. e0069621.
- T. Tada, H. Zhou, B.M. Dcosta, M.I. Samanovic, V. Chivukula, R. Herati, S.R. Hubbard, M.J. Mulligan and N.R. Landau, Increased resistance of SARS-CoV-2 Omicron Variant to Neutralization by Vaccine-Elicited and Therapeutic Antibodies, *EBioMedicine* (2022a), p. 2021.2012.2028.474369.
- T. Tada, H. Zhou, B.M. Dcosta, M.I. Samanovic, M.J. Mulligan and N.R. Landau, Partial resistance of SARS-CoV-2 Delta variants to vaccine-elicited antibodies and convalescent sera, *iScience* (2021b).
- T. Tada, H. Zhou, M.I. Samanovic, B.M. Dcosta, A. Cornelius, R.S. Herati, M.J. Mulligan and N.R. Landau, Neutralization of SARS-CoV-2 Variants by mRNA and Adenoviral Vector Vaccine-Elicited Antibodies, *Frontiers in immunology* **13** (2022b), p. 797589.
- E.C. Thomson, L.E. Rosen, J.G. Shepherd, R. Spreafico, A. da Silva Filipe, J.A. Wojcechowskyj, C. Davis, L. Piccoli, D.J. Pascall, J. Dillen, S. Lytras, N. Czudnochowski, R. Shah, M. Meury, N. Jesudason, A. De Marco, K. Li, J. Bassi, A. O'Toole, D. Pinto, R.M. Colquhoun, K. Culap, B. Jackson, F. Zatta, A. Rambaut, S. Jaconi, V.B. Sreenu, J. Nix, R.F. Jarrett, M. Beltramello, K. Nomikou, M. Pizzuto, L. Tong, E. Cameroni, N. Johnson, A. Wickenhagen, A. Ceschi, D. Mair, P. Ferrari, K. Smollett, F. Sallusto, S. Carmichael, C. Garzoni, J. Nichols, M. Galli, J. Hughes, A. Riva, A. Ho, M.G. Semple, P.J.M. Openshaw, J.K. Baillie, S.J. Rihn, S.J. Lycett, H.W. Virgin, A. Telenti, D. Corti, D.L. Robertson and G. Snell, The circulating SARS-CoV-2 spike variant N439K maintains fitness while evading antibody-mediated immunity, (2020), p. 2020.2011.2004.355842.
- A. Truffot, J. Andreani, M. Le Marechal, A. Caporossi, O. Epaulard, P. Pognard and L. Sylvie, SARS-CoV-2 Variants in Immunocompromised Patient Given Antibody Monotherapy, *Emerging infectious diseases* **27** (2021).
- P.L. Tzou, K. Tao, J. Nouhin, S.-Y. Rhee, B.D. Hu, S. Pai, N. Parkin and R.W. Shafer, Coronavirus Antiviral Research Database (CoV-RDB): An Online Database Designed to Facilitate Comparisons between Candidate Anti-Coronavirus Compounds, **12** (2020), p. 1006.
- C. Vellas, A. Del Bello, D. Alexa, Z. Steinmeyer, L. Tribaudeau, N. Ranger, N. Jeanne, G. Martin-Blondel, P. Delobel, N. Kamar and J. Izopet, Influence of neutralizing monoclonal antibodies on the SARS-CoV-2 quasispecies in patients with COVID-19, *Clin Microb Infect* (2021).
- C. Vellas, N. Kamar and J. Izopet, Resistance mutations in SARS-CoV-2 Omicron variant after tixagevimab-cilgavimab treatment, *Journal of Infection* **85** (2022a), pp. e162-e163.
- C. Vellas, P. Trémeaux, A. Del Bello, J. Latour, N. Jeanne, N. Ranger, C. Danet, G. Martin-Blondel, P. Delobel, N. Kamar and J. Izopet, Resistance mutations in SARS-CoV-2 Omicron variant in patients treated with sotrovimab, *Clinical Microbiology and Infection* **28** (2022b), pp. 1297-1299.
- L. Wang, T. Zhou, Y. Zhang, E.S. Yang, C.A. Schramm, W. Shi, A. Pegu, O.K. Oloniniyi, A.R. Henry, S. Darko, S.R. Narpala, C. Hatcher, D.R. Martinez, Y. Tsybovsky, E. Phung, O.M. Abiona, A. Antia, E.M. Cale, L.A. Chang, M. Choe, K.S. Corbett, R.L. Davis, A.T. DiPiazza, I.J. Gordon, S.H. Hait, T. Hermanus, P. Kgagudi, F. Laboune, K. Leung, T. Liu, R.D. Mason, A.F. Nazzari, L. Novik, S. O'Connell, S. O'Dell, A.S. Olia, S.D. Schmidt, T. Stephens, C.D. Stringham, C.A. Talana, I.-T. Teng, D.A. Wagner, A.T. Widge, B. Zhang, M. Roederer, J.E. Ledgerwood, T.J. Ruckwardt, M.R. Gaudinski, P.L. Moore, N.A. Doria-Rose, R.S. Baric, B.S. Graham, A.B. McDermott, D.C. Douek, P.D. Kwong, J.R. Mascola, N.J. Sullivan and J. Misasi, Ultrapotent antibodies against diverse and highly transmissible SARS-CoV-2 variants, **373** (2021a), p. eabh1766.
- P. Wang, M.S. Nair, L. Lihong, S. Iketani, Y. Luo, Y. Guo, M. Wang, J. Yu, B. Zhang, P.D. Kwong, B.S. Graham, J.R. Mascola, J.Y. Chang, M.T. Yin, M.E. Sobieszczyk, C.A. Kyratsous, L. Shapiro, Z. Sheng, Y. Huang and D.D. Ho, Antibody resistance of SARS-CoV-2 variants B.1.351 and B.1.1.7, *Nature* **593** (2021b), pp. 130-135.

- Q. Wang, Y. Guo, S. Iketani, Z. Li, H. Mohri, M. Wang, J. Yu, A.D. Bowen, J.Y. Chan, J.G. Shah, N. Nguyen, K. Meyers, M.T. Yin, M.E. Sobieszczyk, Z. Sheng, Y. Huang, L. Liu and D. Ho, Antibody evasion by SARS-CoV-2 Omicron subvariants BA.2.12.1, BA.4 and BA.5, *Nature* **608** (2022a), pp. 603–608.
- Q. Wang, S. Iketani, Z. Li, Y. Guo, A.Y. Yeh, M. Liu, J. Yu, Z. Sheng, Y. Huang, L. Liu and D.D. Ho, Antigenic characterization of the SARS-CoV-2 Omicron subvariant BA.2.75, (2022b), p. 2022.2007.2031.502235.
- R. Wang, Q. Zhang, J. Ge, W. Ren, R. Zhang, J. Lan, B. Ju, B. Su, F. Yu, P. Chen, H. Liao, Y. Feng, X. Li, X. Shi, Z. Zhang, F. Zhang, Q. Ding, T. Zhang, X. Wang and L. Zhang, Analysis of SARS-CoV-2 variant mutations reveals neutralization escape mechanisms and the ability to use ACE2 receptors from additional species, *Immunity* **54** (2021c), pp. 1611-1621.e1615.
- Y. Wang, X. Zhang, J. Liu, Y. Wang, W. Zhan, M. Liu, M. Zhang, Q. Wang, Q. Liu, T. Zhu, Y. Wen, Z. Chen, J. Zhao, F. Wu, L. Sun and J. Huang, Combating the SARS-CoV-2 Omicron variant with non-Omicron neutralizing antibodies, (2022c), p. 2022.2001.2030.478305.
- Z. Wang, F. Schmidt, Y. Weisblum, F. Muecksch, C.O. Barnes, S. Finkin, D. Schaefer-Babajew, M. Cipolla, C. Gaebler, J.A. Lieberman, Z. Yang, M.E. Abernathy, K.E. Huey-Tubman, A. Hurley, M. Turroja, K.A. West, K. Gordon, K.G. Millard, V. Ramos, J.D. Silva, J. Xu, R.A. Colbert, R. Patel, J.P. Dizon, C. Unson-O'Brien, I. Shimeliovich, A. Gazumyan, M. Caskey, P.J. Bjorkman, R. Casellas, T. Hatzioannou, P.D. Bieniasz and M.C. Nussenzweig, mRNA vaccine-elicited antibodies to SARS-CoV-2 and circulating variants. *bioRxiv [Preprint]* (2021d), p. 2021.2001.2015.426911.
- K. Westendorf, S. Žentelis, D. Foster, P. Vaillancourt, M. Wiggin, E. Lovett, J. Hendle, A. Pustilnik, J.M. Sauder, L. Kraft, Y. Hwang, R.W. Siegel, J. Chen, B.A. Heinz, R.E. Higgs, N. Kalleward, K. Jepson, R. Goya, M.A. Smith, D.W. Collins, D. Pellacani, P. Xiang, V. de Puyraimond, M. Rivicova, L. Devorkin, C. Pritchard, A. O'Neill, C. Cohen, J. Dye, K.I. Huie, C.V. Badger, D. Kobasa, J. Audet, J.J. Freitas, S. Hassanali, I. Hughes, L. Munoz, H.C. Palma, B. Ramamurthy, R.W. Cross, T.W. Geisbert, I. Lanz, L. Anderson, P. Sipahimalani, K.S. Corbett, L. Wang, E.S. Yang, Y. Zhang, W. Shi, B.S. Graham, J.R. Mascola, T.L. Fernandez, C.L. Hansen, E. Falconer, B.E. Jones and B.C. Barnhart, LY-CoV1404 (bebtelovimab) potently neutralizes SARS-CoV-2 variants, *Cell Rep* (2022), p. 2021.2004.2030.442182.
- M.Y. Wu, E.J. Carr, R. Harvey, H.V. Mears, S. Kjaer, H. Townsley, A. Hobbs, M. Ragno, L.S. Herman, L. Adams, S. Gamblin, M. Howell, R. Beale, M. Brown, B. Williams, S. Gandhi, C. Swanton, E.C. Wall and D.L.V. Bauer, WHO's Therapeutics and COVID-19 Living Guideline on mAbs needs to be reassessed, *Lancet* **400** (2022), pp. 2193-2196.
- W. Yao, D. Ma, H. Wang, X. Tang, C. Du, H. Pan, C. Li, H. Lin, M. Farzan, J. Zhao, Y. Li and G. Zhong, Effect of SARS-CoV-2 spike mutations on animal ACE2 usage and in vitro neutralization sensitivity, (2021), p. 2021.2001.2027.428353.
- C. Yi, X. Sun, Y. Lin, C. Gu, L. Ding, X. Lu, Z. Yang, Y. Zhang, L. Ma, W. Gu, A. Qu, X. Zhou, X. Li, J. Xu, Z. Ling, Y. Xie, H. Lu and B. Sun, Comprehensive mapping of binding hot spots of SARS-CoV-2 RBD-specific neutralizing antibodies for tracking immune escape variants, *Genome Medicine* **13** (2021), p. 164.
- H. Yi, 2019 Novel Coronavirus Is Undergoing Active Recombination, *Clinical Infectious Diseases* **71** (2020), pp. 884-887.
- M. Yuan, D. Huang, C.-C.D. Lee, N.C. Wu, A.M. Jackson, X. Zhu, H. Liu, L. Peng, M.J. van Gils, R.W. Sanders, D.R. Burton, S.M. Reincke, H. Prüss, J. Kreys, D. Nemazee, A.B. Ward and I.A. Wilson, Structural and functional ramifications of antigenic drift in recent SARS-CoV-2 variants, (2021), p. 2021.2002.2016.430500.
- H. Zhou, B.M. Dcosta, N.R. Landau and T. Tada, Resistance of SARS-CoV-2 Omicron BA.1 and BA.2 Variants to Vaccine-Elicited Sera and Therapeutic Monoclonal Antibodies, *Viruses* **14** (2022).
- T. Zhou, L. Wang, J. Misasi, A. Pegu, Y. Zhang, D.R. Harris, A.S. Olia, C.A. Talana, E.S. Yang, M. Chen, M. Choe, W. Shi, I.-T. Teng, A. Creanga, C. Jenkins, K. Leung, T. Liu, E.-S.D. Stancovski, T. Stephens, B. Zhang, Y. Tsybovsky, B.S. Graham, J.R. Mascola, N.J. Sullivan and P.D. Kwong, Structural basis for potent antibody neutralization of SARS-CoV-2 variants including B.1.1.529, (2021), p. 2021.2012.2027.474307.



Identification

Screening

Eligibility

Included

Records identified through  
PubMed searching (n = 98)

Records identified through  
bioRxiv searching (n = 224)

Records identified through  
medRxiv searching (n = 112)

Full-text articles assessed  
for eligibility (n = 434)

Full-text articles  
excluded (n= 400)

Primary research  
discussing baseline  
resistance (n = 36)

Exclusion of  
preprints published  
and indexed in  
PubMed (n =8)

Secondary research  
(n = 364)

Studies included in the  
systematic review (n = 26)

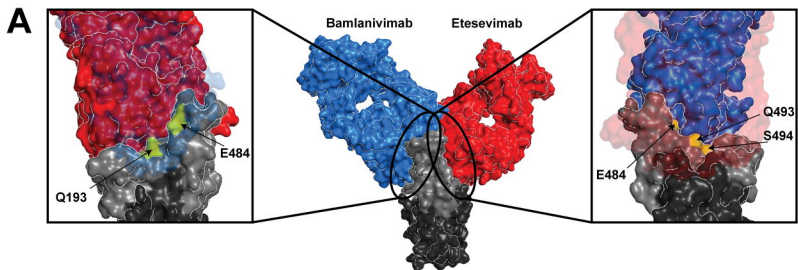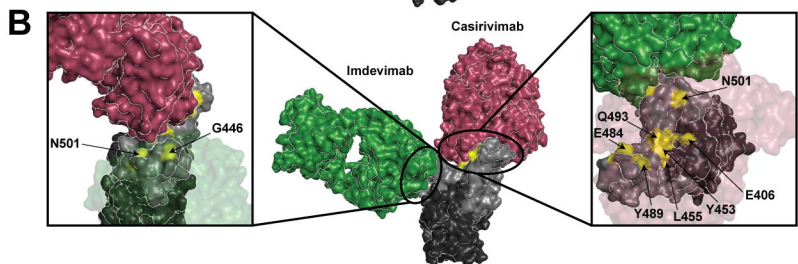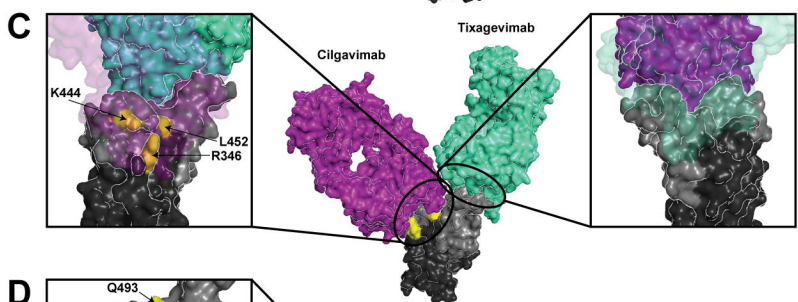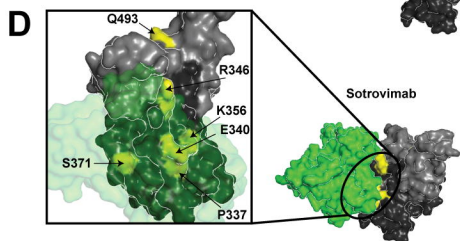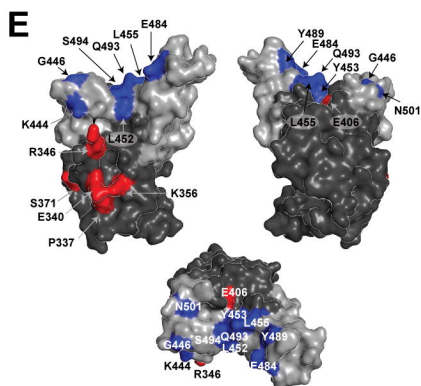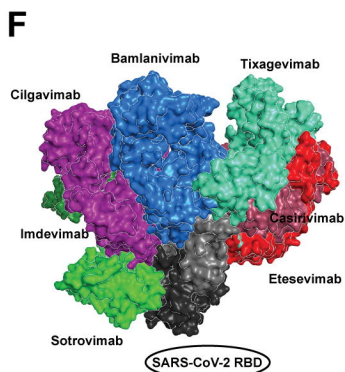



## Sequences over time in World

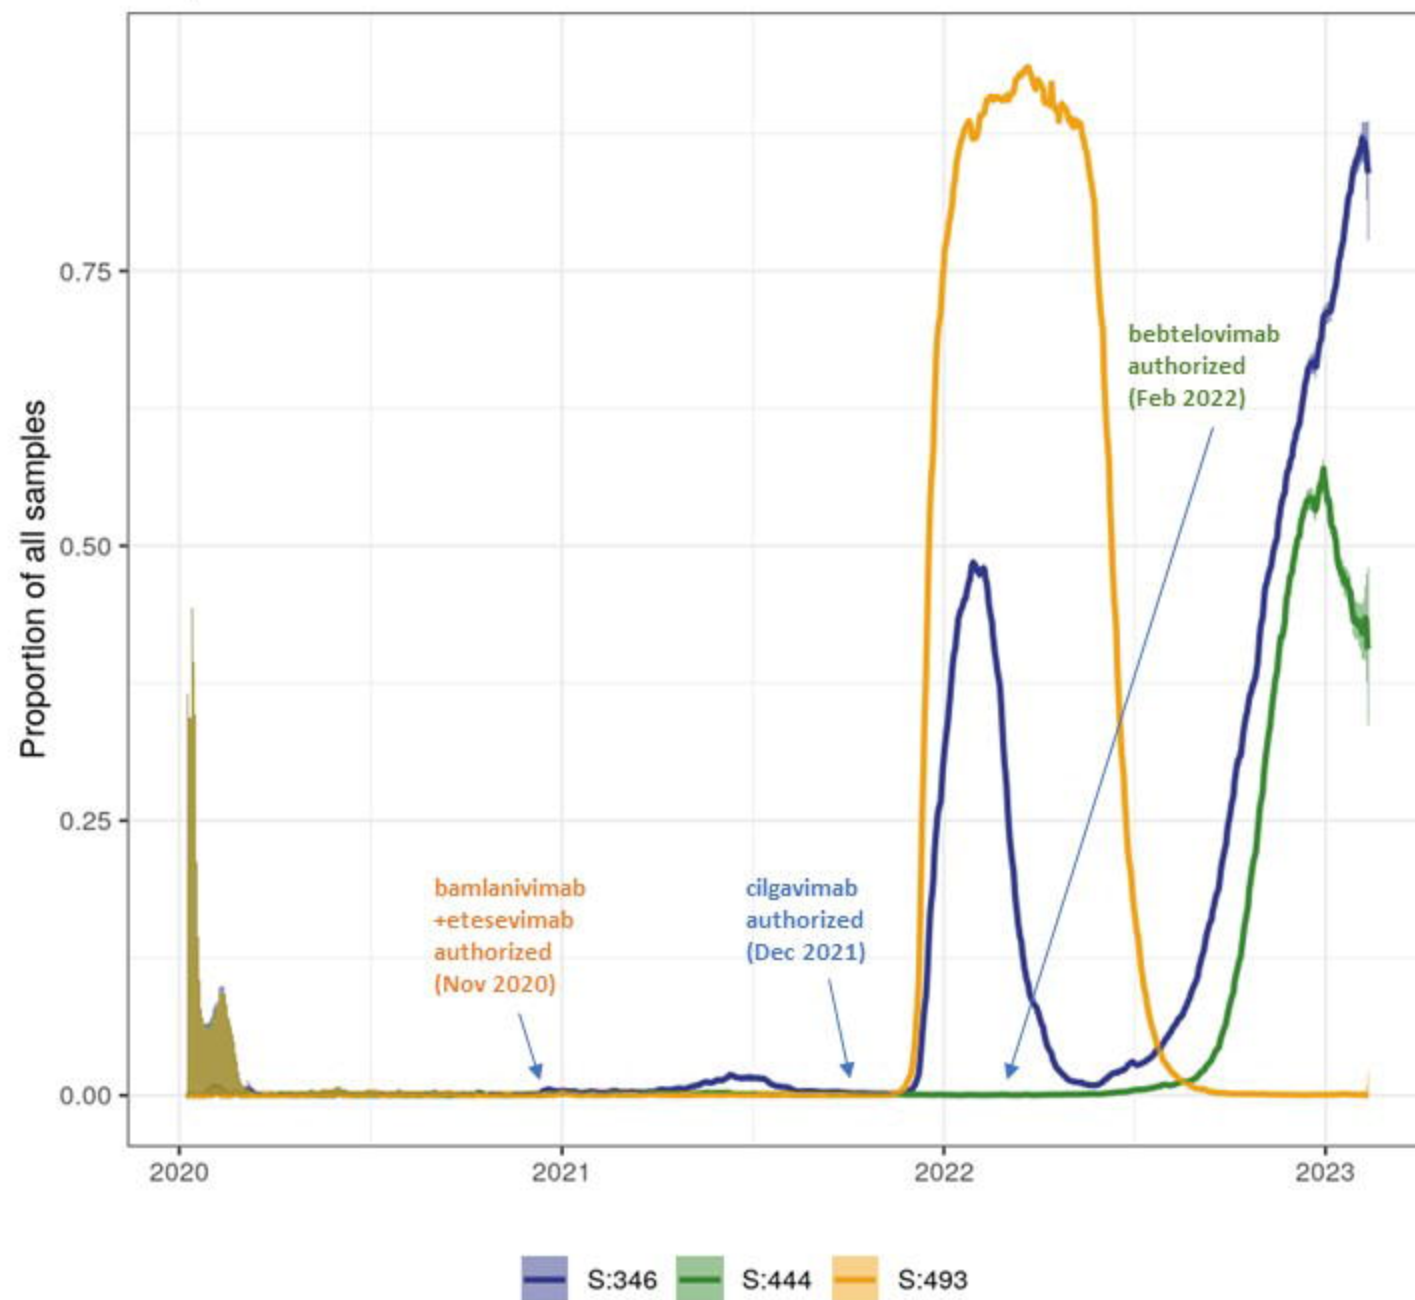

<https://cov-spectrum.org/explore/World/AllSamples/AllTimes/variants?variantQuery=S%3A346&variantQuery1=S%3A493&variantQuery2=S%3A444&analysisMode=CompareEquals&>
